# Supplementary material for: Colloidal self-assembly of soft neural interfaces from injectable photovoltaic microdevices
Source: Royal Society of Chemistry journal article supplement (doi:10.1039/d3ra03591c), 2023-01-01
Supplement: d3ra03591c1.pdf [file d3ra03591c1.pdf]

## Supporting Information

### Colloidal self-assembly of soft neural interfaces from injectable photovoltaic microdevices

Haiyan Jia\*, Zhangjun Huang, Murat Kaynak, and Mahmut Selman Sakar\*

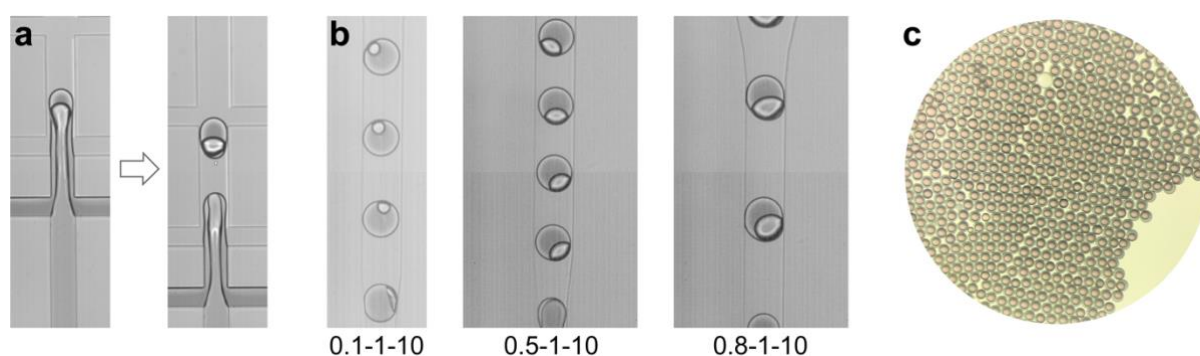

**Figure S1.** Setting flow parameters for the three phases to fabricate core-shell droplets. a) Microfluidic jetting to ensure repeatable encapsulation of the inner TPETA phase within PEDOT:PSS phase. b) Increasing the flow rate of the inner phase while keeping the other two constant increases the diameter of the TPETA core. c) High-throughput formation of monodisperse core-shell droplets.

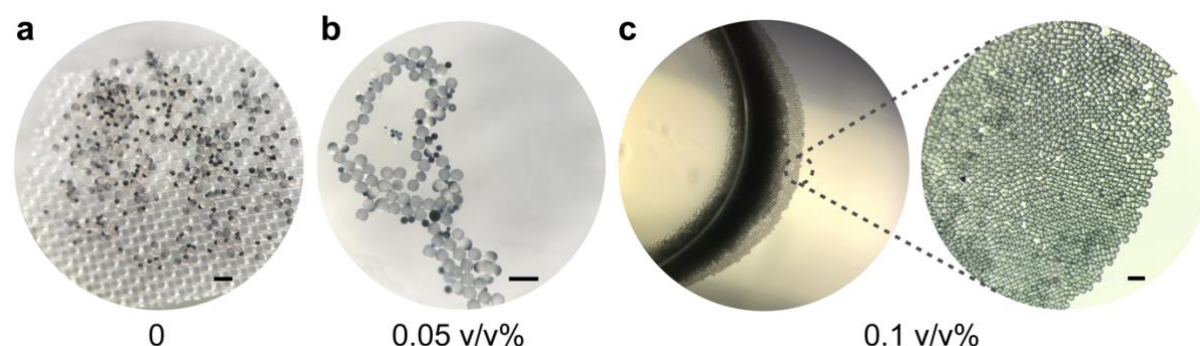

**Figure S2.** Generating uniform and durable PEDOT:PSS films around PTPETA particles. a) Fabrication without GOPS supplement. Janus particles are formed. b) Adding GOPS improves the distribution of coating. c) Optimal results are obtained at 0.1% (v/v) concentration.

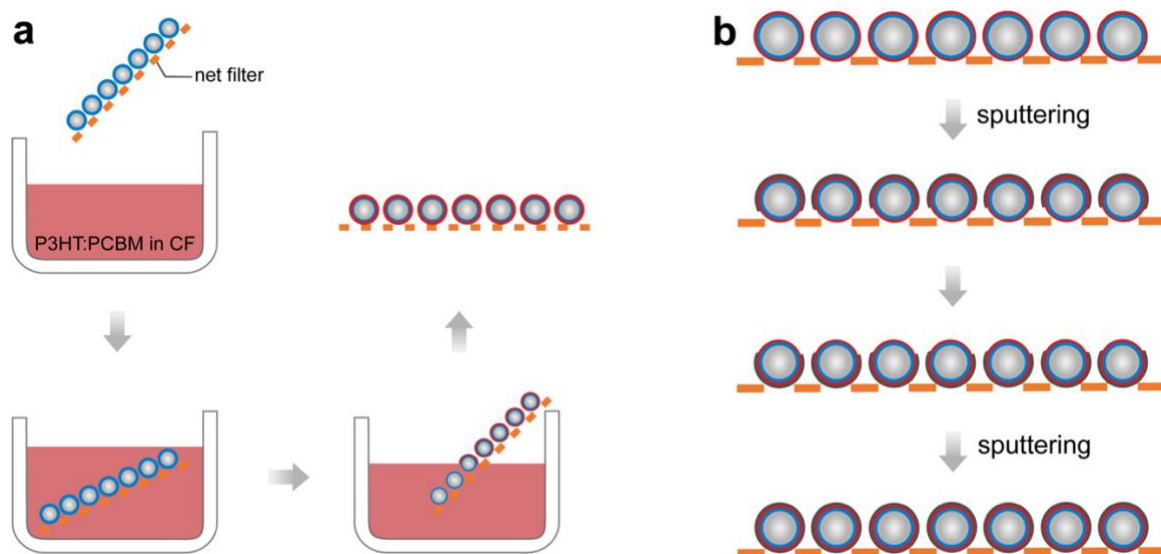

**Figure S3.** Deposition of the photovoltaic film and Ti electrode. a) Schematic illustration of the dip coating process for P3HT:PCBM around the PTPETA particles coated with PEDOT:PSS. b) Schematic illustration of the final metal (Ti) sputtering process.

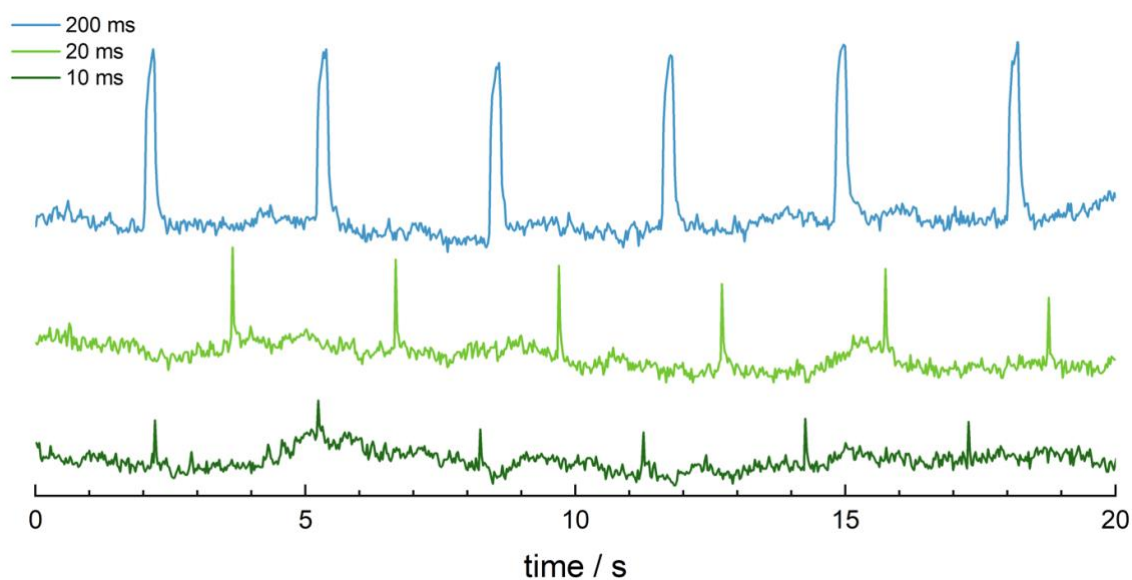

**Figure S4.** Photovoltaic response of a PVM measured for different pulse duration at a power intensity of  $0.175 \text{ mW mm}^{-2}$ .

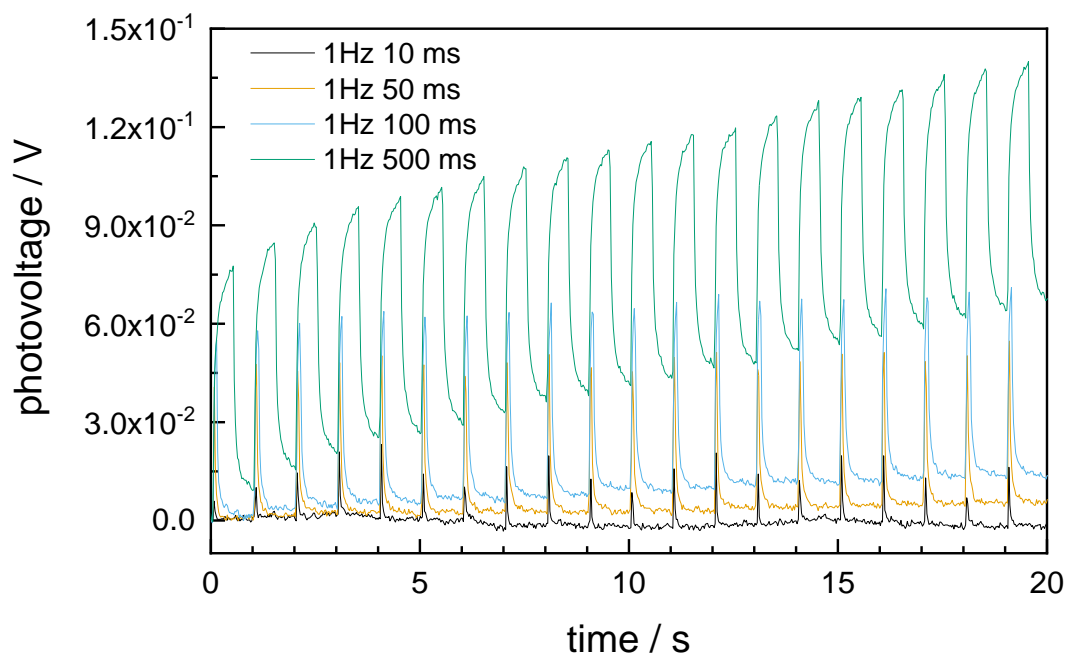

**Figure S5.** Representative PV recording of a PVM at 1 Hz with varying pulse durations at a power intensity of  $0.67 \text{ mW mm}^{-2}$ .

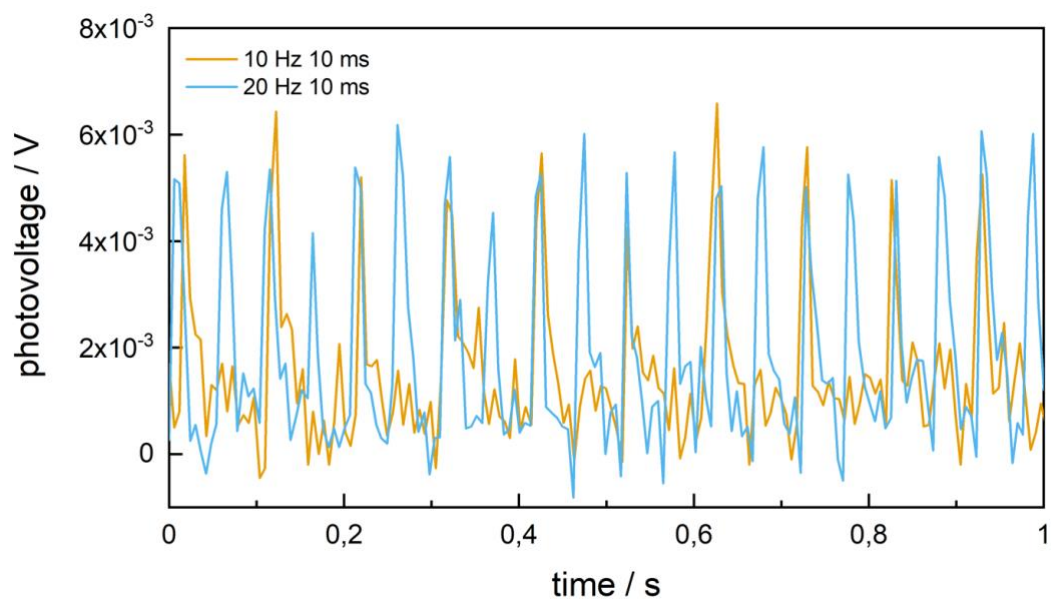

**Figure S6.** Representative PV recording of a PVM at 10 and 20 Hz with 10 ms pulses at a power intensity of  $0.175 \text{ mW mm}^{-2}$ .

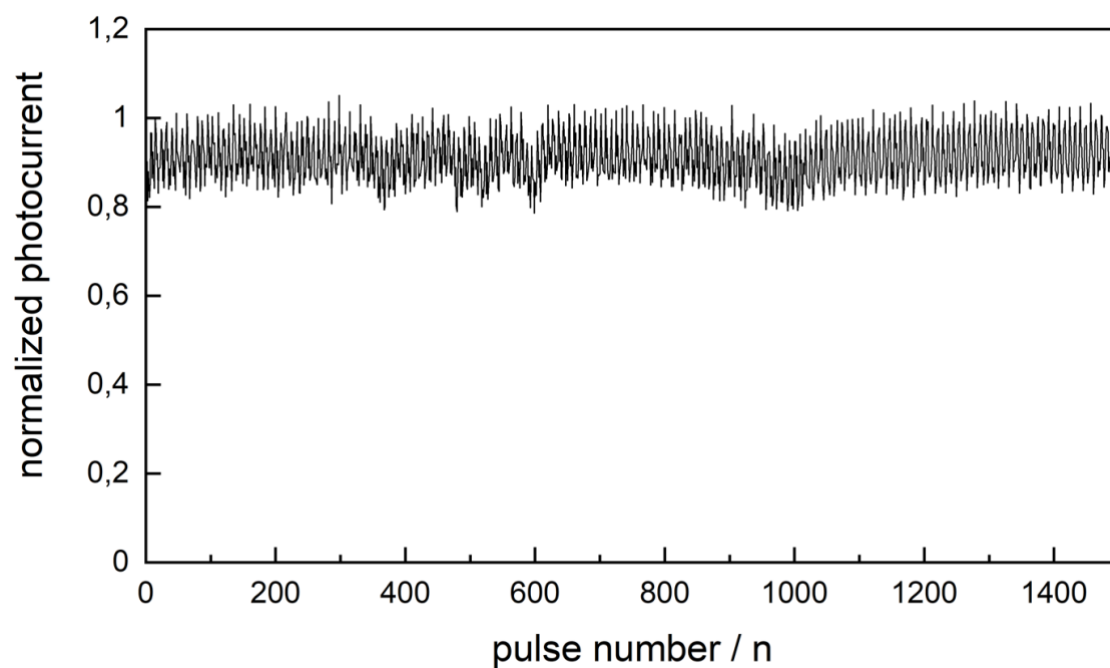

**Figure S7.** PC of a representative PVM over 1500 pulses at 10 Hz with 10 ms pulses for  $0.175 \text{ mW mm}^{-2}$  power intensity.
